# Supplementary material for: Anxiety, depression, and brain overwork in the general population of Mongolia
Source: PubMed Central journal article supplement (PMC10828419; doi:10.1038/s41598-024-52779-w), 2024-01-30
Supplement: 41598_2024_52779_MOESM1_ESM.pdf [file 41598_2024_52779_MOESM1_ESM.pdf]

# Anxiety, Depression, and Mental Distress in the General Population of Mongolia

Battuvshin Lkhagvasuren<sup>1,2\*#</sup>, Tetsuya Hiramoto<sup>3#</sup>, Enkhjin Bat-Erdene<sup>1,4</sup>, Enkhnarantumurbaatar<sup>1</sup>, Gantsetseg Tumur-Ochir<sup>5</sup>, Tzolmontuya Amartuvshin<sup>6</sup>, Myagmartseren Dashtseren<sup>6</sup>, Edward Lai<sup>7</sup>, Vijay Viswanath<sup>8</sup>, Takakazu Oka<sup>2</sup>, Tzolmon Jadamba<sup>1\*</sup>

<sup>1</sup> Brain and Mind Research Institute, Mongolian Academy of Sciences, Ulaanbaatar, Mongolia, <sup>2</sup> Department of Psychosomatic Medicine, International University of Health and Welfare Narita Hospital, Narita, Japan, <sup>3</sup> Department of Psychosomatic Medicine, Fukuoka National Hospital, National Hospital Organization, Fukuoka, Japan, <sup>4</sup> Child Health Institute of New Jersey, Department of Neuroscience and Cell Biology, Robert Wood Johnson Medical School, Rutgers University, New Brunswick, USA, <sup>5</sup> Department of Mental Health Surveillance, National Center for Mental Health, Ulaanbaatar, Mongolia, <sup>6</sup> Department of Family Medicine, School of Medicine, Mongolian National University of Medical Sciences, Ulaanbaatar, Mongolia, <sup>7</sup> School of Osteopathic Medicine, Rowan-Virtua University, Stratford, USA, <sup>8</sup> College of Medicine, University of Cincinnati, Cincinnati, USA

\* Corresponding authors: [battuvshin@neuroscience.mn](mailto:battuvshin@neuroscience.mn) (Battuvshin Lkhagvasuren); [tsolmon@mas.ac.mn](mailto:tsolmon@mas.ac.mn) (Tzolmon Jadamba)

**Table S1. The number and percentage of the sample in each age-sex category compared with results from the 2020 Population and Housing By-Census of Mongolia.**

| Age-sex category   |             | Sample size, n (%) |        | Population, n (%) |        |
|--------------------|-------------|--------------------|--------|-------------------|--------|
| Total              |             | 613                | (100)  | 1910630           | (100)  |
|                    | 18-29       | 118                | (19.2) | 610322            | (31.9) |
| Both sex           | 30-44       | 244                | (39.8) | 780603            | (40.9) |
|                    | 45-65       | 251                | (40.9) | 519705            | (27.2) |
|                    | 18-29       | 30                 | (4.9)  | 273476            | (14.3) |
| Male               | 30-44       | 64                 | (10.4) | 364514            | (19.1) |
|                    | 45-65       | 96                 | (15.7) | 282314            | (14.8) |
|                    | 18-29       | 88                 | (14.4) | 270846            | (14.2) |
| Female             | 30-44       | 180                | (29.4) | 385836            | (20.2) |
|                    | 45-65       | 155                | (25.3) | 333644            | (17.4) |
| Residence location | Rural areas | 341                | (55.6) | 860488            | (45.0) |
|                    | Urban areas | 272                | (44.4) | 1050142           | (55.0) |

n: number.

**Table S2. Brain Overwork Scale – 10 (BOS-10)**

The following questions ask about your thoughts and behaviors in your daily life. There are no right or wrong answers, so please answer honestly and to the best of your ability. If you are unsure about how to answer a question, please choose the answer that feels most like you.

For each question, please indicate how often you have felt or behaved this way in the past week.

| #              | Questions                                                         | 1 | 2 | 3 | 4 | 5 |
|----------------|-------------------------------------------------------------------|---|---|---|---|---|
| Q1             | I did not like to have leisure time                               |   |   |   |   |   |
| Q2             | I tended to overthink even the (most) minor of events             |   |   |   |   |   |
| Q3             | I felt tired when reading newspapers / magazines                  |   |   |   |   |   |
| Q4             | I tended to walk or move fast                                     |   |   |   |   |   |
| Q5             | I tended to stick to one way of doing or thinking about something |   |   |   |   |   |
| Q6             | I felt that others were watching me                               |   |   |   |   |   |
| Q7             | I was not good at waiting                                         |   |   |   |   |   |
| Q8             | I had racing thoughts (was thinking something a lot)              |   |   |   |   |   |
| Q9             | I easily felt tense in public                                     |   |   |   |   |   |
| Q10            | My notebook was full of schedules                                 |   |   |   |   |   |
| <b>Answers</b> |                                                                   |   |   |   |   |   |
| 1              | Very inaccurate / Never (0 day per week)                          |   |   |   |   |   |
| 2              | Moderately inaccurate / Rarely (1-2 day(s) per week)              |   |   |   |   |   |
| 3              | Neutral / Sometimes (3-4 days per week)                           |   |   |   |   |   |
| 4              | Moderately accurate / Frequently (5-6 days per week)              |   |   |   |   |   |
| 5              | Very accurate / Always (7 days per week)                          |   |   |   |   |   |
| <b>Scoring</b> |                                                                   |   |   |   |   |   |
|                | Total BOS: sum all Q1-Q10                                         |   |   |   |   |   |
|                | Domain1 (Excessive thinking): Q2+Q5+Q8                            |   |   |   |   |   |
|                | Domain2 (Hypersensitivity): Q3+Q6+Q9                              |   |   |   |   |   |
|                | Domain3 (Restless behavior): Q1+Q4+Q7+Q10                         |   |   |   |   |   |

**Table S3. Cut-off scores of the HADS and BOS (n=613)**

| Domains                         | Cut-off point |    | Sensitivity (%) | Specificity (%) | PPV (%) | NPV (%) | Youden's index |
|---------------------------------|---------------|----|-----------------|-----------------|---------|---------|----------------|
| Anxiety<br>AUC: 0.73            | >Mean+1SD     | 9  | 0.46            | 0.89            | 0.51    | 0.87    | 0.35           |
|                                 | Clinical      | 4  | 0.93            | 0.25            | 0.23    | 0.94    | 0.18           |
|                                 | Specific      | 10 | 0.35            | 0.93            | 0.55    | 0.85    | 0.28           |
|                                 | Optimal       | 7  | 0.71            | 0.65            | 0.33    | 0.90    | 0.36           |
| Depression<br>AUC: 0.65         | >Mean+1SD     | 9  | 0.26            | 0.87            | 0.33    | 0.83    | 0.13           |
|                                 | Clinical      | 3  | 0.94            | 0.12            | 0.21    | 0.88    | 0.06           |
|                                 | Specific      | 10 | 0.16            | 0.92            | 0.35    | 0.82    | 0.09           |
|                                 | Optimal       | 7  | 0.55            | 0.72            | 0.32    | 0.87    | 0.27           |
| HADS Total score<br>AUC: 0.73   | >Mean+1SD     | 16 | 0.49            | 0.84            | 0.43    | 0.87    | 0.33           |
|                                 | Clinical      | 9  | 0.91            | 0.32            | 0.25    | 0.93    | 0.23           |
|                                 | Specific      | 18 | 0.30            | 0.92            | 0.47    | 0.84    | 0.21           |
|                                 | Optimal       | 12 | 0.76            | 0.62            | 0.33    | 0.91    | 0.38           |
| Excessive thinking<br>AUC: 0.75 | >Mean+1SD     | 9  | 0.55            | 0.80            | 0.31    | 0.92    | 0.36           |
|                                 | Clinical      | 6  | 0.95            | 0.31            | 0.18    | 0.98    | 0.26           |
|                                 | Specific      | 11 | 0.18            | 0.95            | 0.36    | 0.88    | 0.13           |
|                                 | Optimal       | 8  | 0.66            | 0.71            | 0.26    | 0.93    | 0.37           |
| Hypersensitivity<br>AUC: 0.74   | >Mean+1SD     | 8  | 0.37            | 0.85            | 0.28    | 0.90    | 0.22           |
|                                 | Clinical      | 5  | 0.90            | 0.50            | 0.22    | 0.97    | 0.40           |
|                                 | Specific      | 9  | 0.24            | 0.91            | 0.29    | 0.88    | 0.15           |
|                                 | Optimal       | 6  | 0.83            | 0.60            | 0.25    | 0.96    | 0.43           |
| Restless behavior<br>AUC: 0.69  | >Mean+1SD     | 12 | 0.35            | 0.76            | 0.20    | 0.88    | 0.13           |
|                                 | Clinical      | 7  | 0.92            | 0.44            | 0.20    | 0.97    | 0.36           |
|                                 | Specific      | 14 | 0.16            | 0.91            | 0.21    | 0.87    | 0.06           |
|                                 | Optimal       | 8  | 0.87            | 0.50            | 0.21    | 0.96    | 0.37           |
| BOS-10 Total score<br>AUC: 0.76 | >Mean+1SD     | 29 | 0.35            | 0.87            | 0.30    | 0.89    | 0.22           |
|                                 | Clinical      | 20 | 0.92            | 0.52            | 0.23    | 0.97    | 0.36           |
|                                 | Specific      | 31 | 0.19            | 0.91            | 0.25    | 0.88    | 0.10           |
|                                 | Optimal       | 21 | 0.88            | 0.56            | 0.24    | 0.97    | 0.44           |

AUC: area under the curve. BOS-10: brain overwork scale-10. HADS: hospital anxiety and depression scale. n: count. NPV: negative predictive value. PPV: positive predictive value. SD: standard deviation.

**Table S4. HADS scores by different countries.**

| <b>Countries</b>             | <b>n</b> | <b>Anxiety<br/>(cut-off score: 8)</b> | <b>Depression<br/>(cut-off score: 8)</b> | <b>Total<br/>(cut-off score: 17)</b> |
|------------------------------|----------|---------------------------------------|------------------------------------------|--------------------------------------|
| Mongolia (this study)        | 613      | 9.2±4.2 (34.5%)                       | 8.2±3.7 (20%)                            | 17.3±6.6 (20.8%)                     |
| Colombia (Hinz et al. 2014)  | 1500     | 4.6±3.6                               | 4.3±3.9                                  | 13.0±7.8                             |
| Germany (Hinz et al. 2011)   | 4410     | 4.7±3.5 (21%)                         | 4.7±3.9 (23%)                            | 9.5±6.8 (30.2%)                      |
| Italy (Iani et al. 2014)     | 1599     | 7.6±4.4                               | 5.4±4.0                                  | 13.0±7.8                             |
| Russia (Kibitov et al. 2021) | 2610     |                                       | 4.4±2.8 (14.4%)                          |                                      |
| UK (Breeman et al. 2015)     | 6189     | 6.2±4.1                               | 3.9±3.7                                  | 10.1±7.9                             |
| UK (Crawford et al. 2001)    | 1792     | 6.1±3.8                               | 3.7±3.1                                  | 9.8±6.0                              |

HADS: hospital anxiety and depression scale. n: count.
